# Supplementary material for: Isolation of biofluids from tissues using a vacuum-assisted filtration biomedical device
Source: Royal Society of Chemistry journal article supplement (doi:10.1039/d3ay00090g), 2023-01-01
Supplement: d3ay00090g1.xlsx [file d3ay00090g1.xlsx]

## Sheet: Sheet1
Table S1. The 12 genes with the highest level of enriched expression in liver. "Tissue distribution" describes the transcript detection (nTPM≥1) in liver as well as in all other tissues. "mRNA (tissue)" shows the transcript level in liver as nTPM values. "Tissue specificity score (TS)" corresponds to the fold-change between the expression level in liver and the tissue with the second-highest expr…
Gene	Description	mRNA (tissue)	Tissue specificity score	Plasma protein	Glycosylation
SPP2	Secreted phosphoprotein 2	519.1	4373	Y	Y*
AHSG	a2-HS glycoprotein	5817.6	4302	Y	Y
MBL2	Mannose binding lectin 2	280.9	2810	Y	Y* (O)
CFHR2	Complement factor H related 2	1311.8	2752	Y	Y
F9	Coagulation factor IX	704.9	2467	Y	Y
CFHR5	Complement factor H related 5	167.5	1675	Y	Y*
F2	Coagulation factor II, thrombin	1217.3	1518	Y	Y
A1BG	a1-B glycoprotein	1224.7	1493	Y	Y
APOA2	Apolipoprotein A2	36012.6	1388	Y	Y
SERPINC1	Serpin family C member 1	5056.6	1341	Y	Y
APOC4-APOC2	APOC4-APOC2 readthrough (NMD candidate)	2221	1258	N	Y* (O)
HPX	Hemopexin	5440.6	908	Y	Y
